# Supplementary material for: Water Stress and Aphid Feeding Differentially Influence Metabolite Composition in Arabidopsis thaliana (L.)
Source: PubMed Central journal article supplement (PMC3492492; doi:10.1371/journal.pone.0048661), 2012-11-07

**Table S1: UV-spectra of desulfo GS from *Arabidopsis* (Col-0)**

| Glucosinolate (GS)        | Spectrum |
|---------------------------|----------|
| 3-methylsulfinylpropyl GS |          |
| 4-methylsulfinylbutyl GS  |          |
| 5-methylsulfinylpentyl GS |          |
| 6-methylsulfinylhexyl GS  |          |
| 7-methylsulfinylheptyl GS |          |
| 8-methylsulfinyloctyl GS  |          |
| 4-methylthiobutyl GS      |          |
| 7-methylthioheptyl GS     |          |

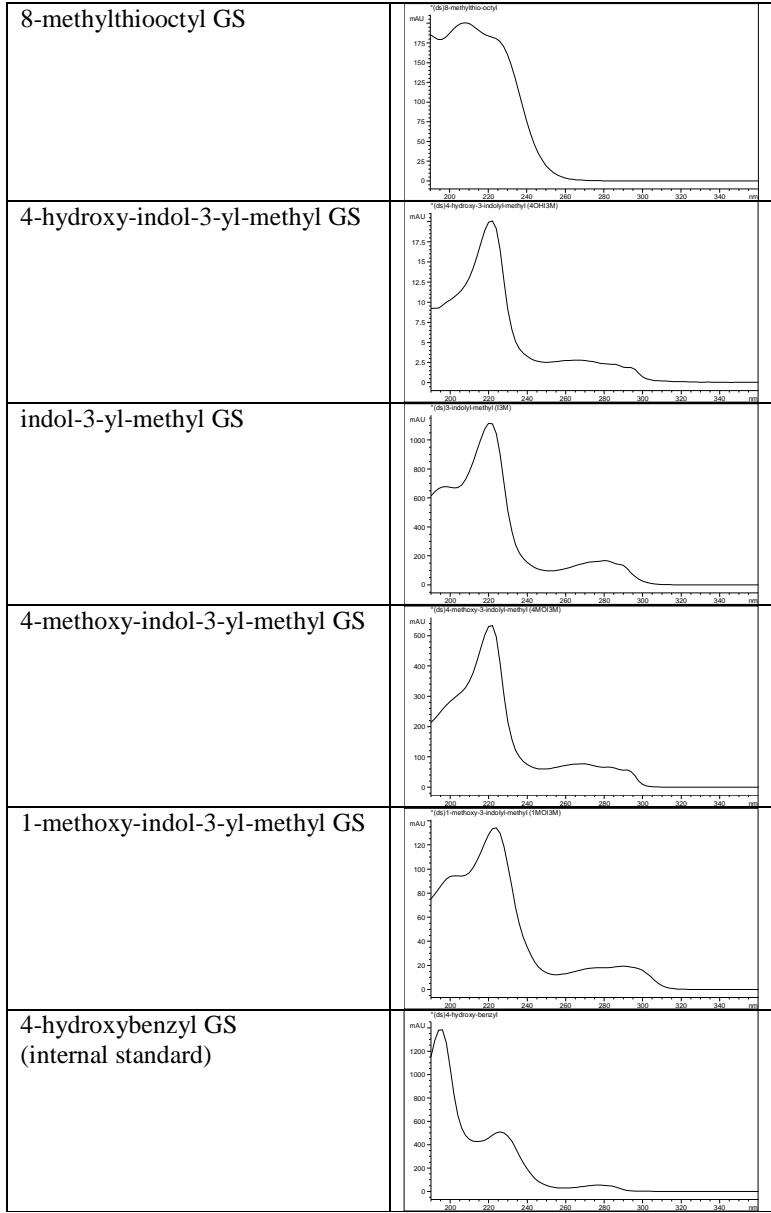

Supplement: pone.0048661.s001.pdf [file pone.0048661.s001.pdf]
