# Supplementary material for: Water Stress and Aphid Feeding Differentially Influence Metabolite Composition in Arabidopsis thaliana (L.)
Source: PubMed Central journal article supplement (PMC3492492; doi:10.1371/journal.pone.0048661), 2012-11-07
Supplement: pone.0048661.s002.pdf [file pone.0048661.s002.pdf]

**Table S2.** Primers list of genes associated with glucosinolate, camalexin biosynthesis or signalling pathways.

| Gene             | AGI no.   | Primers                                                           |
|------------------|-----------|-------------------------------------------------------------------|
| BCAT4            | At3g19710 | (f) 5'-TGTACTGGCACTGCTTCCA<br>(r) 5'-TCAATCTCCACCGTCCATC          |
| MAM1             | At5g23010 | (f) 5'-AGAATCACGGATGCTGATTTG<br>(r) 5'-GGAAATTGATATTACTGTGGTACAC  |
| MAM3             | At5g23020 | (f) 5'-AATCACAGACGCTGATCTGAA<br>(r) 5'-TGACTTAATACCATCGTAGTACCA   |
| CYP79F1          | At1g16410 | (f) 5'-AGTTCCGTCCTTAAGAAGAAGA<br>(r) 5'-TTATTATGAAGTGACGGAGATTC   |
| CYP79F2          | At1g16400 | (f) 5'-GCTAAGCCTCTTCTTTTGTCTGT<br>(r) 5'-TCATGATTAAGTTACGGAGATACA |
| CYP83A1          | At4g13770 | (f) 5'-GCGAACCTTCTCCTCAGC<br>(r) 5'-GAGAGACGATTGCCATTTAAG         |
| UGT74C1          | At2g31790 | (f) 5'-AGGAGGTAGTTCCGACAAGA<br>(r) 5'-TCATATATGGATTTGTTGGGAG      |
| CYP79B2          | At4g39950 | (f) 5'-CACTTGGAAGCTACCTGAGA<br>(r) 5'-GAACCAAGAAACCAACACACA       |
| CYP79B3          | At2g22330 | (f) 5'-TTAAGTGGAACTAGCAGGAAG<br>(r) 5'-CAAAAGGACCAAAACCGAAC       |
| CYP83B1          | At4g31500 | (f) 5'-TGGGATTGCAATGGTAGAGA<br>(r) 5'-CATTGGTCACGCCATATCTAC       |
| UGT74B1          | At1g24100 | (f) 5'-GAAAGGAGTGATGGAAGGAG<br>(r) 5'-TTGAATCACAGTCATCGTGGT       |
| SUR1 (C-S-Lyase) | At2g20610 | (f) 5'-GTTGGAGCTGTCATTGATGGA<br>(r) 5'-GCACACACATCCTCTTCTGT       |
| TGG1             | AT5G26000 | (f) 5'-GCTCCTTATCTATGGAGCAAG<br>(r) 5'-ACGTTACCGACGAAGACTCT       |
| CaEF             | At2g33380 | (f) 5'-GTAACCGAGGGAAATCGAATG<br>(r) 5'-TCCCCAAACTGAATAACAAGAC     |
| BGL1             | At1g52400 | (f) 5'-CGAGGTTTCGGACTTTACTACA<br>(r) 5'-CGAACAACTCACAAGTCCTTC     |
| PR1              | At2g14610 | (f) 5'-AGTCAGTGAGACTCGGATGTG<br>(r) 5'-CATCCTGCATATGATGCTCCT      |
| PAD3 (CYP71B15)  | AT3G26830 | (f) 5'-AGGAGGAAGCCAAAGAGATC<br>(r) 5'-AGCTGACTCCAACCTGGATCA       |
| MYB28            | At5g61420 | (f) 5'-GACTTCTTGGGAAACATCGG<br>(r) 5'-CACTGAGCAGATTCGCAATG        |
| MYB29            | At5g07690 | (f) 5'-AATACTGGAGGAGGATATAACC<br>(r) 5'-GTTCTTGTCGTCATAATCTTGG    |
| MYB51            | At1g18570 | (f) 5'-AAGTGTTCGTTGACTCTGAA<br>(r) 5'-AAATTATCGCAGTACATTAGAGGA    |
| MYB34            | AT5G60890 | (f) 5'-CTTCGGCGACGGTGGAGTTTCC<br>(r) 5'-ATGCAATCACTCACAAACCGA     |
| MYB76            | AT5G07700 | (f) 5'-TCGGTACGAGCATTGATCTC<br>(r) 5'-TGGGATGGTCAAGAAGATAAG       |
| MYB122           | AT1G74080 | (f) 5'-CGAGACGACGTCGTTTAATG<br>(r) 5'-CGGTCGAAACACACTACACA        |
